# Supplementary material for: Dietary Protein Consumption and the Risk of Type 2 Diabetes: A Systematic Review and Meta-Analysis of Cohort Studies
Source: MDPI journal article supplement (doi:10.3390/nu9090982), 2017-09-06
Supplement: s1 [file s1]

| <b>Table S1. Characteristics of participants and follow-up in included studies of protein consumption in relation to risk of T2DM</b> |                         |                                                                                          |                |                                |                           |                     |
|---------------------------------------------------------------------------------------------------------------------------------------|-------------------------|------------------------------------------------------------------------------------------|----------------|--------------------------------|---------------------------|---------------------|
| <b>Author</b>                                                                                                                         | <b>Publication year</b> | <b>Study name</b>                                                                        | <b>country</b> | <b>Age at baseline (years)</b> | <b>No. of participant</b> | <b>No. of cases</b> |
| Malik et al <sup>15</sup>                                                                                                             | 2016                    | Nurses' Health Study                                                                     | USA            | 30-55                          | 72992                     | 7214                |
| Malik et al <sup>15</sup>                                                                                                             | 2016                    | Nurses' Health Study II                                                                  | USA            | 24-42                          | 92088                     | 5032                |
| Malik et al <sup>15</sup>                                                                                                             | 2016                    | Health Professionals Follow-up Study                                                     | USA            | 40-75                          | 40722                     | 3334                |
| Akiko et al <sup>17</sup>                                                                                                             | 2015                    | Japan Public Health Center-Based Prospective Study                                       | Jpapr          | 40-59                          | 64674                     | 1191                |
| Monique et al <sup>10</sup>                                                                                                           | 2014                    | European Prospective Investigation into Cancer and Nutrition and a stratified sub cohort | Europe         |                                | 26253                     | 11637               |
| Ulrika et al <sup>11</sup>                                                                                                            | 2013                    | Malmo Diet and Cancer cohort                                                             | USA            | 47-74                          | 27140                     | 1709                |
| Weo et al <sup>12</sup>                                                                                                               | 2013                    | Women's Health Study                                                                     | USA            | 25-44                          | 15294                     | 870                 |
| Tinker et al <sup>13</sup>                                                                                                            | 2011                    | Women's Health Initiative                                                                | USA            | 50-79                          | 74155                     | 19111               |
| Sluijs et al <sup>14</sup>                                                                                                            | 2010                    | European Prospective Investigation into Cancer and Nutrition(EPIC)-NL Study              | Europe         | 21-64                          | 38094                     | 918                 |

**Table S2. Prospective cohort studies of protein consumption and type 2 diabetes.**

| study                                            | Follow-up period               | DM diagnosis and criteria                 | RR(95%CI) total | RR(95%CI) animal | RR(95%CI) plant | Adjustment variables                                                                                                              |
|--------------------------------------------------|--------------------------------|-------------------------------------------|-----------------|------------------|-----------------|-----------------------------------------------------------------------------------------------------------------------------------|
| Malik et al, 2016(1) <sup>15</sup> ,USA          | 1984-2008,24y#                 | Self-report+ Supplementary questionnaires | 1.04(0.96,1.13) | 1.08(0.99,1.19)  | 0.91(0.52,1.02) | age,BMI,race,family history of diabetes, smoking status,alcohol intake, physical activity,total energy intake, menopausal status  |
| Malik et al, 2016(2) <sup>15</sup> ,USA          | 1991-2009,18y#                 | Same as above                             | 1.03(0.92,1.15) | 1.11(0.98,1.25)  | 0.90(0.79,1.04) |                                                                                                                                   |
| Malik et al, 2016(3) <sup>15</sup> ,USA          | 1986-2008,24y#                 | Same as above                             | 1.18(1.04,1.34) | 1.27(1.11,1.46)  | 0.91(0.77,1.07) |                                                                                                                                   |
| Akiko et al, 2015 <sup>17</sup> (men), Jpapn     | 1993-1998,5y<br>1993-2003,10y# | self-report+ examine medical records      | 1.36(0.97,2.14) | 1.46(0.94,2.27)  | 0.88(0.30,1.30) | age,study area, BMI, smoking status,fat, carbohydrate, alcohol consumption,FH-DM total physical activity, history of hypertension |
| Akiko et al, 2015 <sup>16</sup> (women),Japan    | Same as above#                 | Same as above                             | 0.87(0.55,1.38) | 1.37(0.82,2.28)  | 0.91(0.61,1.35) |                                                                                                                                   |
| Monique et al, 2014 <sup>10</sup> (men), Europe  | 1991-2007,12y § # &            | Self-report                               | 1.04(0.83,1.31) | 1.01(0.71,1.43)  | 1.50(1.16,1.93) | age,energy,sex,smoking ,education,physical activity, alcohol, fiber, SFA,MUFA,PUFA,cholesterol, soft drink,tea,coffee,BMI,waist   |
| Monique et al, 2014 <sup>10</sup> (women) Europe | Same as above § # &            | Same as above                             | 1.37(1.06,1.79) | 1.38(1.01,1.90)  | 1.24(0.91,1.68) |                                                                                                                                   |

**Table S2. (continued)**

**Table S3. Characteristics of participants and follow-up in included studies of meat consumption in relation to risk of T2DM**

| <b>Author</b>                | <b>Publication year</b> | <b>Study name</b>                                 | <b>country</b> | <b>Age at baseline (years)</b> | <b>No. of participant</b> | <b>No. of cases</b> |
|------------------------------|-------------------------|---------------------------------------------------|----------------|--------------------------------|---------------------------|---------------------|
| Van Dan et al <sup>19</sup>  | 2012                    | Health Professionals' Follow-up stud              | USA            | 40-75                          | 42501                     | 1321                |
| Schulze et al <sup>22</sup>  | 2003                    | Nurses' Health Study II                           | USA            | 26-46                          | 91246                     | 741                 |
| Lee et al <sup>26</sup>      | 2004                    | Women's Health Study                              | USA            | 55-69                          | 35698                     | 1921                |
| Fung et al <sup>21</sup>     | 2004                    | Nurses' Health Study                              | USA            | 55-69                          | 35698                     | 1921                |
| Song et al <sup>23</sup>     | 2004                    | Women's Health Study                              | USA            | ≥45                            | 37309                     | 1558                |
| Montonen et al <sup>28</sup> | 2005                    | Finnish Mobile Clinic Health Examination Survey   | Finland        | 40-69                          | 4304                      | 382                 |
| Villegas et al <sup>24</sup> | 2006                    | Shanghai Women's Health Study                     | China          | 40-70                          | 70909                     | 1972                |
| Hodge et al <sup>20</sup>    | 2007                    | Melbourne Collaborative Cohort Study              | Australia      | 27-75                          | 31641                     | 365                 |
| Schulze et al <sup>27</sup>  | 2007                    | EPIC-Potsdam Cohort Study                         | Germany        | 35-65                          | 25167                     | 849                 |
| Simmons et al <sup>25</sup>  | 2007                    | EPIC-Norfolk Cohort Study                         | Uk             | 40-79                          | 25038                     | 417                 |
| Vang et al <sup>29</sup>     | 2008                    | Adventist Mortality Study, Adventist Health Study | USA            | 45-88                          | 8701                      | 543                 |

**Table S4. Prospective cohort studies of meat consumption and type 2 diabetes**

| study                                    | Follow-up period | DM diagnosis and criteria                                                                          | RR(95%CI)       | RR(95%CI)       | Adjustment variables                                                                                                                                                                          |
|------------------------------------------|------------------|----------------------------------------------------------------------------------------------------|-----------------|-----------------|-----------------------------------------------------------------------------------------------------------------------------------------------------------------------------------------------|
|                                          |                  |                                                                                                    | Red meat        | Processed meat  |                                                                                                                                                                                               |
| Van Dan, et al, 2012 <sup>19</sup> , USA | 1986-1998, 12 y# | self-report+Supplemental questionnaires WHO 1985, validated DM2 status                             | 1.04(0.96,1.13) | 1.05(0.85-1.30) | Age, total energy, time period, physical activity, cigarette smoking, alcohol, hypercholesterolaemia, cereal hypertension, FH-DM2, fiber, magnesium, BMI                                      |
| Schulze, et al, 2003 <sup>22</sup> , USA | 1991-1999, 8y#   | Self-report+supplemental questionnaires,validated method for assessment of DMS NDDG                | 1.82(1.34,2.46) | 1.44(0.92,2.24) | Age, BMI, FH-DM, alcohol, smoking, menopausal status, dietary energy, hypertension, physical activity, HRT, OC use.cereal fiber, magnesium, caffeine, glycaemic index, hypercholesterolaemia, |
| Lee, et al, 2004 <sup>26</sup> , USA     | 1986-1997. 11y#  | Self-report                                                                                        | 1.19(0.97-1.45) |                 | Age, total energy, WHR, BMI, physical activity,HRT, cigarette smoking, alcohol, education, marital status, residential area, animal fat, vegetable fat, cereal fiber, magnesium               |
| Fung, et al, 2004 <sup>21</sup> , USA    | 1984-1998, 14y#  | self-report+supplemental questionnaires NDDG, validated DM2 status                                 | 1.36(1.18,1.56) | 1.60(1.39,1.83) | Age, FH-DM2, smoking, menopausal status, dietary, hypercholesterolaemia, hypertension, physical activity, alcohol, BMI, missing FFQ                                                           |
| Song, et al, 2004 <sup>23</sup> , USA    | 1993-2003, 8y#   | Self-report+ supplemental questionnaires.Blood samples in subgroup using ADA, validated DMS status | 1.25(0.94,1.67) | 1.38(1.11,1.71) | age,study area, BMI, smoking status,fat, carbohydrate, alcohol consumption,FH-DM total physical activity, history of hypertension                                                             |

| <b>Table S4. (continued)</b>                  |                                             |                                                                                                   |                               |                                     |                                                                                                                                              |
|-----------------------------------------------|---------------------------------------------|---------------------------------------------------------------------------------------------------|-------------------------------|-------------------------------------|----------------------------------------------------------------------------------------------------------------------------------------------|
| <b>study</b>                                  | <b>Follow-up period</b>                     | <b>DM diagnosis and criteria</b>                                                                  | <b>RR(95%CI)<br/>Red meat</b> | <b>RR(95%CI)<br/>Processed meat</b> | <b>Adjustment variables</b>                                                                                                                  |
| Montonen, et al, 2005 <sup>28</sup> , Finland | 1967-1990, 23 y#                            | Identified from register of persons receiving drug imbursement                                    | 1.22(0.89,1.69)               | 0.99(0.72,1.38)                     | Age, sex, BMI, energy intake, smoking, FH-DM, geographic area                                                                                |
| Villegas, et al, 2006 <sup>24</sup> , China   | 1997-2000-2004, 4.6y, 326581 person-years # | Self-report analysis of 1094 cases confirmed by ADA criteria yielded similar results to all cases | 0.94(0.79,1.12)               | 1.18(0.99,1.37)                     | Age, energy, BMI, WHR, smoking, alcohol, physical activity, vegetable intake, income level, education level, occupation status, hypertension |
| Hodge, et al, 2007 <sup>20</sup> ,Australia   | 1990-1994, 4y#                              | Self-report+physician confirmation for 76% of cases                                               | 0.99(0.72,1.38)               | 1.22(0.89,1.69)                     | Age, energy intake, FH-DM, country of birth, BMI, WHR                                                                                        |
| Schulze, et al, 2007 <sup>27</sup> , Germany  | 1994-1998-2005,7y #                         | Self-report+physician verification                                                                | 1.64(1.23,2.19)               |                                     | Age, height, alcohol, coffee, waist circumference, sports, hypertension, whole grains, biking, gardening, smoking                            |
| Simmons, et al, 2007 <sup>25</sup> ,Uk        | 1993-1998, 4.6y, 115137 person-years #      | Self-report, health checks, hospital and general practice registers, HbA1c>7%, medications        | 2.26(1.10,4.66)               | 2.95(1.39,6.25)                     | Crude                                                                                                                                        |

| <b>Table S4. (continued)</b>                                                                                                                                                        |                         |                                  |                               |                                     |                                                                                                             |
|-------------------------------------------------------------------------------------------------------------------------------------------------------------------------------------|-------------------------|----------------------------------|-------------------------------|-------------------------------------|-------------------------------------------------------------------------------------------------------------|
| <b>study</b>                                                                                                                                                                        | <b>Follow-up period</b> | <b>DM diagnosis and criteria</b> | <b>RR(95%CI)<br/>Red meat</b> | <b>RR(95%CI)<br/>Processed meat</b> | <b>Adjustment variables</b>                                                                                 |
| Vang, et al, 1960-1976, 17 y#<br>2008 <sup>29</sup> , USA                                                                                                                           |                         | Self-report                      | 1.27(1.06,1.53)               | 1.38(1.05,1.82)                     | Age, sex, Exclusion of smokers, alcohol users and those with pre-existing disease did not alter the results |
| FH-DM, family history of diabetes; FH-DM2, family history of type 2 diabetes; M, men; W, women; NA, not available; HRT, hormone replacement therapy; OC use, oral contraceptive use |                         |                                  |                               |                                     |                                                                                                             |
| #Diet assessment method was FFQ                                                                                                                                                     |                         |                                  |                               |                                     |                                                                                                             |

| <b>Table S5. Characteristics of participants and follow-up in included studies of fish consumption in relation to risk of T2DM</b> |                         |                                                 |                |                                |                           |                     |
|------------------------------------------------------------------------------------------------------------------------------------|-------------------------|-------------------------------------------------|----------------|--------------------------------|---------------------------|---------------------|
| <b>Author</b>                                                                                                                      | <b>Publication year</b> | <b>Study name</b>                               | <b>country</b> | <b>Age at baseline (years)</b> | <b>No. of participant</b> | <b>No. of cases</b> |
| Montonen et al <sup>28</sup>                                                                                                       | 2005                    | Finnish Mobile Clinic Health Examination Survey | Finland        | 40-69                          | 4301                      | 383                 |
| Kaushik et al <sup>36</sup>                                                                                                        | 2009                    | Nurses' Health Study                            | USA            | 30-55                          | 61031                     | 4159                |
| Kaushik et al <sup>36</sup>                                                                                                        | 2009                    | Nurses' Health Study II                         | USA            | 26-46                          | 91669                     | 2728                |
| Kaushik et al <sup>36</sup>                                                                                                        | 2009                    | Health Professionals Follow-up Study            | USA            | 39-78                          | 42504                     | 2493                |
| Patel et al <sup>35</sup>                                                                                                          | 2009                    | EPIC-Norfolk                                    | England        | 40-79                          | 21442                     | 700                 |
| Geertruida et al <sup>34</sup>                                                                                                     | 2005                    | The Netherlands, Rotterdam Study                | Netherlands    | ≥55                            | 4472                      | 463                 |
| Djousse et al <sup>31</sup>                                                                                                        | 2011                    | Women's Health Study                            | USA            | ≥ 45                           | 36328                     | 2370                |
| Villegas et al <sup>32</sup>                                                                                                       | 2011                    | Shanghai Women's Health Study                   | China          | 40-70                          | 64193                     | 3034                |
| Villegas et al <sup>32</sup>                                                                                                       | 2011                    | Shanghai men's Health Study                     | China          | 40-74                          | 51963                     | 900                 |
| Nanri et al <sup>33</sup>                                                                                                          | 2011                    | Public Health Center-based Prospective Study    | Japan          | 45-75                          | 52680                     | 971                 |
| Wallin et al <sup>30</sup>                                                                                                         | 2015                    | The Cohort of Swedish Men                       | Swedish        | 45-79                          | 35583                     | 3624                |



| Table S6. Prospective cohort studies of fish consumption and type 2 diabetes |                  |                                                                                                                       |                 |                                                                                                                                                                                                                                                                                         |  |
|------------------------------------------------------------------------------|------------------|-----------------------------------------------------------------------------------------------------------------------|-----------------|-----------------------------------------------------------------------------------------------------------------------------------------------------------------------------------------------------------------------------------------------------------------------------------------|--|
| study                                                                        | Follow-up period | DM diagnosis and criteria                                                                                             | RR(95%CI)       | Adjustment variables                                                                                                                                                                                                                                                                    |  |
| Montonen, et al, 2005 <sup>28</sup> ,Finland                                 | 1967-1995, 28 y# | Fasting glucose level $\geq 7.0$ mmol/L, plasma glucose level $\geq 11.1$ mmol/L, treatment by diet                   | 1.08(0.80,1.45) | Age, sex, BMI, total energy, smoking, FH-DM, geographic area(hypertension, serum cholesterol, self-rated health occupation                                                                                                                                                              |  |
| Kaushik, et al, 2009(1) <sup>36</sup> ,USA                                   | 1986-2005, 20y#  | Self report+ Fasting glucose level $\geq 7.0$ mmol/L, plasma glucose level $\geq 11.1$ mmol/L                         | 1.29(1.05,1.57) | Age, BMI, physical activity, saturated fat, trans fat, linolenic acid, caffeine, cereal fiber, glycemic index, alcohol, total energy, smoking,FH-DM, hormone replacement therapy, waist circumference, ratio of polyunsaturated to saturated fat, processed meat, carbonated soft drink |  |
| Kaushik, et al, 2009(2) <sup>36</sup> ,USA                                   | 1986-2005, 20y#  | Same as above                                                                                                         | 1.32(0.99,1.74) |                                                                                                                                                                                                                                                                                         |  |
| Kaushik, et al, 2009(3) <sup>36</sup> ,USA                                   | 1986-2005, 20y#  | Same as above                                                                                                         | 1.16(0.96,1.41) |                                                                                                                                                                                                                                                                                         |  |
| Patel, et al, 2009 <sup>35</sup> , England                                   | Same as above#   | Self-report+diagnosis captured                                                                                        | 0.75(0.58,0.96) | Age, sex, BMI, waist circumference, physical activity, plasma vitamin C, alcohol, total energy, smoking, family history of diabetes, education                                                                                                                                          |  |
| Geertruida,et al, 2009 <sup>34</sup> Netherlands                             | 1990-2005, 15y # | Fasting glucose level $\geq 7.0$ mmol/L, plasma glucose level $\geq 11.1$ mmol/L, treatment by diet,diabetes register | 1.05(0.80,1.38) | Age, sex, trans fat, fiber, alcohol, total energy, smoking, education, BMI, waist circumference, saturated fat, $\alpha$ -linolenic acid, linoleic acid, fruit, vegetable, meat, coffee, medically prescribed diet, hypertension, total cholesterol, HDL-C, FH-DM                       |  |

| Table S6. (continued)                              |                  |                                                                                                                                           |  |                 |                                                                                                                          |
|----------------------------------------------------|------------------|-------------------------------------------------------------------------------------------------------------------------------------------|--|-----------------|--------------------------------------------------------------------------------------------------------------------------|
| study                                              | Follow-up period | DM diagnosis and criteria                                                                                                                 |  | RR(95%CI)       | Adjustment variables                                                                                                     |
| Djousse , et al, 2011 <sup>31</sup> (men), USA     | 1992-2008, 16y # | Fasting plasma glucose ≥7.8mmol/L, casual plasma glucose≥11mmol/L                                                                         |  | 0.73(0.54,1.00) | Age, sex, BMI, physical activity, alcohol, total energy, smoking, LDL-C, clinic site, race                               |
| Djousse , et al, 2011 <sup>31</sup> (women), USA   | Same as above#   | Same as above                                                                                                                             |  | 1.01(0.69,1.49) |                                                                                                                          |
| Nanri, et al 2011 <sup>33</sup> , (men) Japan      | 1995-2003,8y#    | Fasting plasma glucose≥7.8mmol/L, casual plasma glucose≥11mmol/L                                                                          |  | 0.73(0.54,1.00) | Age, sex, BMI, physical activity, alcohol, total energy, smoking, LDL-C, clinic site, race                               |
| Nanri, et al 2011 <sup>33</sup> , (men) Japan      | Same as above#   | Same as above                                                                                                                             |  | 1.01(0.69,1.49) |                                                                                                                          |
| Villegas, et al, 2011 <sup>32</sup> (women), China | 1996-2006, 10y#  | Fasting glucose concentration≥7mmol/L on ≥2 separate occasions, oral-glucose-tolerance test ≥ 11.1 mmol/L, use of hypoglycemic medication |  | 0.86(0.76,0.98) | Age,sex, BMI, waist circumference, physical activity, plasma vitamin C, alcohol, total energy, smoking, FH-DM, education |
| Villegas, et al, 2011 <sup>32</sup> (men), China   | 2002-2008, 6y#   | Same as above                                                                                                                             |  | 0.92(0.73,1.16) |                                                                                                                          |

**Table S6. (continued)**

| <b>study</b>                                                                                                                                                                           | <b>Follow-up<br/>period</b> | <b>DM diagnosis and criteria</b> | <b>RR(95%CI)</b> | <b>Adjustment variables</b>                                                                                                                                                                                                                                          |
|----------------------------------------------------------------------------------------------------------------------------------------------------------------------------------------|-----------------------------|----------------------------------|------------------|----------------------------------------------------------------------------------------------------------------------------------------------------------------------------------------------------------------------------------------------------------------------|
| Wallin, et al, 1998-2012,15y#<br>2015 <sup>30</sup> (men)<br>Swedish                                                                                                                   |                             | Diabetes register                | 1.00(0.85,1.18)  | Age, BMI, physical activity, education, cigarette smoking, total energy intake, intake of alcohol, DASH diet component score(based on intake of fruits, vegetables, nuts, legumes, low-fat dairy, whole grains, sodium, sweetened beverages, red and processed meat) |
| FH-DM, family history of diabetes; W, women; M, men; SFA, saturated fatty acid; MUFA, monounsaturated fatty acid; PUFA, polyunsaturated fatty acid<br>#Diet assessment method was FFQ. |                             |                                  |                  |                                                                                                                                                                                                                                                                      |

**Table S7. Characteristics of participants and follow-up in included studies of egg consumption in relation to risk of T2DM**

| <b>Author</b>                | <b>Publication year</b> | <b>Study name</b>                                | <b>country</b> | <b>Age at baseline (years)</b> | <b>No. of participant</b> | <b>No. of cases</b> |
|------------------------------|-------------------------|--------------------------------------------------|----------------|--------------------------------|---------------------------|---------------------|
| Djousse et al <sup>37</sup>  | 2009                    | Physicians' Health Study I                       | USA            | >40                            | 20703                     | 1921                |
| Djousse et al <sup>37</sup>  | 2009                    | Women's Health Study                             | USA            | >45                            | 36295                     | 2112                |
| Djousse et al <sup>38</sup>  | 2010                    | Cardiovascular Health Study                      | USA            | >65                            | 3898                      | 303                 |
| Djousse et al <sup>39</sup>  | 2016                    | The Jackson Heart Study                          | USA            | 21-95                          | 4568                      | 513                 |
| Virtanen et al <sup>40</sup> | 2015                    | Kuopio Ischaemic Heart Disease Risk Factor Study | Finland        | 42-60                          | 2332                      | 432                 |

**Table S8. Prospective cohort studies of egg consumption and type 2 diabetes**

| <b>study</b>                                       | <b>Follow-up period</b> |      | <b>DM diagnosis and criteria</b>                                                     | <b>RR(95%CI)</b> | <b>Adjustment variables</b>                                                                                                                                                                              |
|----------------------------------------------------|-------------------------|------|--------------------------------------------------------------------------------------|------------------|----------------------------------------------------------------------------------------------------------------------------------------------------------------------------------------------------------|
| Djousse, et al, 2009(1) <sup>37</sup> (men), USA   | 1982-2007, 20y#         | mean | Self-report or medical record                                                        | 1.58(1.25,2.01)  | Age, smoking, alcohol, physical activity, BMI, FH-DM, hyperliidemia, hypertension, red meat intake, energy, fruits and vegetables, saturated fatty acids, trans fatty acids, polyunsaturated fatty acids |
| Djousse, et al, 2009(2) <sup>37</sup> (women), USA | 1992-2007, 11.7y#       | mean | Same as above                                                                        | 1.77(1.28,2.43)  |                                                                                                                                                                                                          |
| Djousse, et al, 2010(1) <sup>38</sup> (men), USA   | 1989-2007, 11.3y#       | mean | Medical record                                                                       | 1.81(0.77,4.22)  | Age, race, field center, BMI, physical activity, energy, smoking alcohol, fiber intake                                                                                                                   |
| Djousse, et al, 2010(2) <sup>38</sup> (women), USA | Same as above#          |      | Same as above                                                                        | 0.38(0.10,1.37)  |                                                                                                                                                                                                          |
| Djousse, et al, 2016 <sup>39</sup> ,USA            | 2000-2004#              |      | Fasting glucose≥126mg/dL,hemoglobi n A1C≥6.5%,or use of insulin or oral hypoglycemic | 1.52(1.17,1.97)  | Age, smoking, alcohol, BMI, physical activity score, education, energy intake, intake of red meat and fruits and vegetables, dietary trans fat, magnesium, fiber, history of hypertension, CVD           |

| Table S8. (continued)                                                                                                                                                                     |                    |                                                                                                                         |                 |                                                                                                                                                                                                                                                            |
|-------------------------------------------------------------------------------------------------------------------------------------------------------------------------------------------|--------------------|-------------------------------------------------------------------------------------------------------------------------|-----------------|------------------------------------------------------------------------------------------------------------------------------------------------------------------------------------------------------------------------------------------------------------|
| study                                                                                                                                                                                     | Follow-up period   | DM diagnosis and criteria                                                                                               | RR(95%CI)       | Adjustment variables                                                                                                                                                                                                                                       |
| Virtanen, et al, 2015 <sup>40</sup> ,Finland                                                                                                                                              | 1984-1989, 19.3y # | Self-report+fasting plasma glucose $\geq$ 7.0mmol/L or 2-h oral-glucose-tolerance-test plasma glucose $\geq$ 11.1mmol/L | 0.38(0.27,0.53) | Age, examination year, energy intake, BMI, FH-DM2, hypertension, smoking, education year, leisure-time physical activity, serum long-chain omega-3, PUFAs, intake of alcohol, linoleic acid, fiber,fruit, berries, vegetables, dietary cholesterol intake. |
| FH-DM, family history of diabetes; FH-DM2, family history of type 2 diabetes; M, men; W, women; CVD,cardiovascular disease; PUFA, polyunsaturated fatty acid; CVD,cardiovascular disease; |                    |                                                                                                                         |                 |                                                                                                                                                                                                                                                            |
| #Diet assessment method was FFQ.                                                                                                                                                          |                    |                                                                                                                         |                 |                                                                                                                                                                                                                                                            |

| <b>Table S9. Characteristics of participants and follow-up in included studies of dairy consumption in relation to risk of T2DM</b> |                         |                                                     |                |                                |                           |                     |
|-------------------------------------------------------------------------------------------------------------------------------------|-------------------------|-----------------------------------------------------|----------------|--------------------------------|---------------------------|---------------------|
| <b>Author</b>                                                                                                                       | <b>Publication year</b> | <b>Study name</b>                                   | <b>country</b> | <b>Age at baseline (years)</b> | <b>No. of participant</b> | <b>No. of cases</b> |
| Grantham et al <sup>41</sup>                                                                                                        | 2013                    | the Australian Diabetes Obesity and Lifestyle Study | Australia      | ≥25                            | 5582                      | 209                 |
| Choi et al <sup>42</sup>                                                                                                            | 2005                    | Health Professionals Follow-up Study                | USA            | mean age 53                    | 41254                     | 1234                |
| Liu et al <sup>43</sup>                                                                                                             | 2006                    | Women's Health Study                                | USA            | mean age 55                    | 37183                     | 1603                |
| Van Dam et al <sup>44</sup>                                                                                                         | 2006                    | Black Women's Health Study                          | USA            | mean age 3                     | 41186                     | 1964                |
| Elwood et al <sup>48</sup>                                                                                                          | 2007                    | Caerphilly prospective study                        | UK             | 45-59                          | 640                       | 41                  |
| Kirii et al <sup>47</sup>                                                                                                           | 2009                    | Japan Public Health Center-based Prospective Study  | Japan          | mean age 57                    | 25877                     | 634                 |
| Kirii et al <sup>47</sup>                                                                                                           | 2016                    | Japan Public Health Center-based Prospective Study  | Japan          | mean age 57                    | 33919                     | 480                 |
| Dial-Lopez et al <sup>45</sup>                                                                                                      | 2011                    | Shanghai men's Health Study                         | Spanish        | 55-80                          | 3454                      | 270                 |
| Karen et al <sup>46</sup>                                                                                                           | 2011                    | Women's Health Study                                | USA            | 40-79                          | 93676                     | 3946                |

**Table S10. Prospective cohort studies of dairy consumption and type 2 diabetes**

| study                                                     | Follow-up period    | DM diagnosis and criteria                                                                                                                                 | RR(95%CI)       |                                    |                      | Adjustment variables                                                                                                                                                          |
|-----------------------------------------------------------|---------------------|-----------------------------------------------------------------------------------------------------------------------------------------------------------|-----------------|------------------------------------|----------------------|-------------------------------------------------------------------------------------------------------------------------------------------------------------------------------|
|                                                           |                     |                                                                                                                                                           | Total product   | dairy                              | Whole milk<br>yogurt |                                                                                                                                                                               |
| Grantham, et al, 2013(1) <sup>41</sup> (men) Australia    | 1999-2000-2005, 5y# | Fasting plasma glucose $\geq 7.0$ mmol/L or 2h post-load plasma glucose $\geq 11.1$ mmol/L or current treatment with insulin or oral hypoglycaemic agents | 0.53(0.29,0.96) | 1.43(0.83,2.45)<br>0.57(0.32,1.02) | 1.02(0.56,1.88)      | Age ,sex, total energy intake, FH-DM, education, physical activity, smoking status, fasting serum TAG, HDL-C, systolic blood pressure, waist circumference, hip circumference |
| Grantham, et al, 2013(2) <sup>41</sup> (women) ,Australia | Same as above#      | Same as above                                                                                                                                             | 0.86(0.50,1.45) | 0.89(0.45,1.75)<br>0.67(0.40,1.12) | 1.23(0.74,2.04)      |                                                                                                                                                                               |
| Choi, et al, 2005 <sup>42</sup> (men), USA                | 12y#                | Fasting plasma glucose $\geq 7.8$ mmol/l and/or 2h post-load plasma glucose $\geq 11.1$ mmol/l or treatment with insulin or oral hypoglycemic medication  | 0.77(0.62,0.95) | 0.97(0.78,1.21)<br>0.73(0.59,0.89) | 0.83(0.66,1.06)      | Age, energy, biennial follow-up time, FH-DM, smoking, BMI, hypertension, physical activity, alcohol, dietary factors, hypercholesterolemia                                    |
| Liu, et al, 2006 <sup>43</sup> (men), USA                 | 10y#                | Fasting plasma glucose $\geq 7.0$ mmol/L or 2h post-load plasma glucose $\geq 11.1$ mmol/L                                                                | 0.79(0.64,0.94) | 1.05(0.88,1.24)<br>0.79(0.67,0.93) | 0.82(0.70,0.97)      | Age, energy, BMI, smoking randomized-treatment assignment, FH-DM, hypercholesterolemia, hypertension, physical activity, hormones, alcohol consumption                        |



| Table S10. (continued)                                               |                  |                                                                                       |     |                                  |                                    |                     |                                                                                                                                          |  |
|----------------------------------------------------------------------|------------------|---------------------------------------------------------------------------------------|-----|----------------------------------|------------------------------------|---------------------|------------------------------------------------------------------------------------------------------------------------------------------|--|
| study                                                                | Follow-up period | DM diagnosis criteria                                                                 | and | RR(95%CI)<br>Total dairy product | RR(95%CI)<br>Whole milk            | RR(95%CI)<br>yogurt | Adjustment variables                                                                                                                     |  |
| Van Dam, et al, 8y#<br>2006 <sup>44</sup><br>(women),USA             |                  | Fasting plasma glucose<br>≥7.0mmol/L or 2h<br>post-load plasma glucose<br>≥11.1mmol/L |     | 0.93(0.75,1.15)                  | 1.03(0.88,1.20)<br>0.87(0.76,1.00) |                     | Age, energy, BMI, smoking, physical activity, alcohol consumption, parental history of diabetes, education, coffee, diet.                |  |
| Elwood, et al, 25y #<br>2007 <sup>48</sup> (men), UK                 |                  | Plasma insulin level<br>≥163mmol/l and/or<br>plasma glucose<br>≥6.1mmol/l             |     | 0.57(0.20,1.63)                  |                                    |                     | Age, smoking, BMI, social class                                                                                                          |  |
| Kirii, et al, 12y#<br>2009 <sup>47</sup> (men),<br>Japan             |                  | Fasting plasma<br>glucose≥7.8mmol/l and<br>casual plasma<br>glucose≥11mmol/l          |     | 1.18(0.90,1.56)                  |                                    | 1.02(0.85,1.24)     | Age, area, BMI, FH-DM, smoking, alcohol, history of hypertension, exercise frequency, coffee, energy-adjusted magnesium and total energy |  |
| Kirii, et al, Same as above#<br>2009 <sup>47</sup> (women),<br>Japan |                  | Same as above                                                                         |     | 0.71(0.51,0.98)                  |                                    | 0.87(0.70,1.09)     |                                                                                                                                          |  |

**Table S10. (continued)**

| study                                            | Follow-up period | DM diagnosis criteria                                                       | and | RR(95%CI)<br>Total dairy product | RR(95%CI)<br>Whole milk | RR(95%CI)<br>yogurt | Adjustment variables                                                                                                                                                     |
|--------------------------------------------------|------------------|-----------------------------------------------------------------------------|-----|----------------------------------|-------------------------|---------------------|--------------------------------------------------------------------------------------------------------------------------------------------------------------------------|
| Dial-Lopez, et al, 2016 <sup>45</sup><br>Spanish | 4.1y#            | Fasting plasma glucose≥7.0mmol/L or 2h post-load plasma glucose ≥11.1mmol/L |     | 0.68(0.47,0.98)                  | 0.65(0.45,0.94)         | 0.60(0.42,0.86)     | Age, race/ethnicity, total energy intake, income, education, smoking, alcohol consumption, use of postmenopausal hormone, physical activity, FH-DM, BMI, blood pressure. |
| Karen, et al, 2011 <sup>46</sup> (women)<br>USA  | 1993-1995,5y#    | Self- report+ treated with insulin or oral medication for diabetes          |     | 0.93(0.83,1.04)                  | 0.65(0.44,0.96)         | 0.46(0.31,0.68)     | Age, race/ethnicity, total energy intake, income, education, smoking, alcohol consumption, use of postmenopausal hormone, physical activity, FH-DM, BMI, blood pressure. |

FH-DM, family history of diabetes; W, women; M, men;HDL-C, high density lipoprotein cholesterol  
#Diet assessment method was FFQ.

**Table S11. Characteristics of participants and follow-up in included studies of soy consumption in relation to risk of T2DM**

| <b>Author</b>                    | <b>Publication year</b> | <b>Study name</b>                           | <b>country</b> | <b>Age at baseline (years)</b> | <b>No. of participant</b> | <b>No. of cases</b> |
|----------------------------------|-------------------------|---------------------------------------------|----------------|--------------------------------|---------------------------|---------------------|
| Stuapa et al <sup>50</sup>       | 2013                    | India's third National Family Health Survey | India          | 20-49                          | 99574                     | 56742               |
| Villegas et al <sup>51</sup>     | 2008                    | Health Professionals Follow-up Study        | China          | middle-aged                    | 64227                     | 1608                |
| Mueller et al <sup>52</sup>      | 2012                    | The Singapore Chinese Health Study(SCHS)    | Singapore      | mean age 55.2                  | 43176                     | 2252                |
| M aldwaairji et al <sup>53</sup> | 2013                    | The UK Women Cohort's Study                 | UK             | middle age                     | 12149                     |                     |
| Morimoto et al <sup>53</sup>     | 2011                    | the Multiethnic Cohort.                     | USA            | 45-75                          | 29719 Caucasian           | 8594                |
| Morimoto et al <sup>53</sup>     | 2011                    | the Multiethnic Cohort.                     | USA            | 45-75                          | 35141 Japanese            |                     |
| Morimoto et al <sup>53</sup>     | 2011                    | the Multiethnic Cohort.                     | USA            | 45-75                          | 10484 Native              |                     |

| Table S12. Prospective cohort studies of soy consumption and type 2 diabetes |                                  |                                                                                                                   |                  |                                                                                                                                                                |
|------------------------------------------------------------------------------|----------------------------------|-------------------------------------------------------------------------------------------------------------------|------------------|----------------------------------------------------------------------------------------------------------------------------------------------------------------|
| study                                                                        | Follow-up period                 | DM diagnosis and criteria                                                                                         | RR(95%CI)        | Adjustment variables                                                                                                                                           |
| Stuapa, et al, 2013(1) <sup>49</sup> (men)<br>India                          | 1y#                              | Self report                                                                                                       | 0.70(0.39,1.26)  | BMI, tobacco smoking, alcohol drinking, age, watching TV, education, living standard of the household, residence, consumption of other food items.             |
| Stuapa, et al, 2013(2) <sup>49</sup><br>(women) India                        | Same as above#                   | Same as above                                                                                                     | 0.55(0.34,0.88)  |                                                                                                                                                                |
| Villegas, et al, 2008 <sup>50</sup> (women),<br>China                        | 2000-2003- 2004<br>Average 4.6y# | Fasting glucose concentration≥ 7mmol/L,<br>oral-glucose-tolerance test≥11.1mmol/L, use of hypoglycemic medication | 0.62(0.51, 0.75) | Age, race, field center, BMI, physical activity, energy, smoking alcohol, fiber intake                                                                         |
| Mueller, et al, 2012 <sup>51</sup> ,<br>Singapore                            | 1999-2004, 6y#                   | Self-report                                                                                                       | 0.86(0.67,1.10)  | Age, sex, dialect, year of interview, education level, smoking status, alcohol use, physical activity, baseline hypertensive, rice, noodles, vegetable, energy |
| M aldwairji, et al,2013 <sup>52</sup><br>(women),UK                          | Average 4 y                      | Self-report                                                                                                       | 0.49(0.29,0.84)  | Energy, smoking status, adult weight change, socioeconomic status, alcohol intake, physical activity, FH-DM                                                    |
| Morimoto, et al, 2011 <sup>53</sup> (men),<br>USA                            | 1993-1996-2009, 14y #            | Self- report+ treated with insulin or oral medication for diabetes                                                | 1.18(1.08,1.29)  |                                                                                                                                                                |

---

**Table S12. (continued)**

---

| <b>study</b>                                                                                          | <b>Follow-up<br/>period</b> | <b>DM diagnosis and criteria</b> | <b>RR(95%CI)</b> | <b>Adjustment variables</b> |
|-------------------------------------------------------------------------------------------------------|-----------------------------|----------------------------------|------------------|-----------------------------|
| Morimoto, et al,<br>2011 <sup>53</sup> (women),<br>USA                                                | Same as above #             | Same as above                    | 1.18(1.08,1.29)  |                             |
| FH-DM, family history of diabetes; DM, diabetes; W, women; M, men<br>#Diet assessment method was FFQ. |                             |                                  |                  |                             |

---
